# Supplementary material
Source: publisher figshare collection journal article supplement (https://diabetesjournals.figshare.com/ndownloader/files/27557573)
Supplement: Supplementary file 1 [file 27557573]

|  | **OB (n=23)** | **POB (n=23)** | **NO (n=23)** | **P-Value** | | |
| --- | --- | --- | --- | --- | --- | --- |
| **OB vs POB** | **OB vs NO** | **POB vs NO** |
| **Age, years** | 42.2±9.7 | 44.7±9.7 | 43.9±11.7 | <0.0001 | 0.5956 | 0.92 |
| **BMI, kg/m2** | 38.3±2.66 | 25.0±2.64 | 24.5±2.70 | <0.0001 | <0.0001 | 0.52 |
| **WHR** | 0.98±0.07 | 0.90±0.06 | 0.87±0.07 | <0.0001 | <0.0001 | 0.14 |
| **fP-Glucose, mmol/l** | 5.32±0.45 | 5.10±0.37 | 5.05±0.40 | 0.0276 | 0.0329 | 0.67 |
| **fS-Insulin, mU/I** | 13.00±6.12 | 4.94±1.88 | 6.05±3.12 | <0.0001 | <0.0001 | 0.15 |
| **fP-HDL cholesterol, mmol/l** | 1.20±0.26 | 1.73±0.35 | 1.64±0.33 | <0.0001 | <0.0001 | 0.39 |
| **fP-triglyceride, mmol/l** | 1.30±0.50 | 0.74±0.22 | 0.88±0.40 | <0.0001 | 0.0029 | 0.15 |
| **HOMAIR** | 3.13±1.66 | 1.14±0.51 | 1.37±0.77 | <0.0001 | 0.0001 | 0.23 |
| **M value, mg/kg x min** | 4.28±1.62 | 7.42±1.62 | 8.39±1.98 | <0.0001 | <0.0001 | 0.077 |
| **Systolic blood pressure, mmHg** | 137±16 | 125±15 | 121±16 | 0.0035 | 0.0013 | 0.44 |
| **Diastolic blood pressure, mmHg** | 84±12 | 78±11 | 76±10 | 0.0450 | 0.0220 | 0.51 |
| **Fat cell volume, pl** | 879±187 | 308±100 | 483±183 | <0.0001 | <0.0001 | 0.0003 |
| **Adipo-IR** | 9.41±5.32 | 3.33±2.19 | 3.46±2.02 | <0.0001 | <0.0001 | 0.83 |
| **Log Adipo-IR** | 0.90±0.25 | 0.46±0.22 | 0.47±0.25 | <0.0001 | <0.0001 | 0.84 |
| **Mean P-glucose, mmol/l (60-120 min)** | 4.92±0.16 | 4.96±0.097 | 4.97±0.14 | 0.30 | 0.32 | 0.99 |
| **Mean P-insulin mU/l (75-115 min)** | 240±47 | 180±30 | 211±43 | <0.0001 | 0.034 | 0.008 |
| **S-FFA, mmol/l (-5 min)** | 0.64±0.13 | 0.68±0.17 | 0.62±0.17 | 0.21 | 0.60 | 0.21 |
| **S-FFA , mmol/l (115 min)** | 0.044±0.033 | 0.019±0.025 | 0.026±0.022 | 0.019 | 0.04 | 0.33 |
| **FFA (115min)/FFA(-5 min)** | 0.074±0.060 | 0.025±0.030 | 0.047±0.038 | 0.006 | 0.083 | 0.048 |

**Table S2. Clinical cohort characterization.** Values are mean ± SD or numbers and compared by student’s t-test. BMI, body mass index; fP, fasting plasma; fS, fasting insulin; WHR, waist-to-hip ratio. P-values are indicated using paired (OB vs POB) or unpaired (NO vs POB and NO vs OB) t-test.
